# Supplementary material for: Synthesis of long TiO2 nanowire arrays with high surface areas via synergistic assembly route for highly efficient dye-sensitized solar cells
Source: Royal Society of Chemistry journal article supplement (doi:10.1039/c2jm32883f), 2012-01-01
Supplement: c2jm32883f.pdf [file c2jm32883f.pdf]

**Electronic Supplementary Information (ESI) available for:**

**Long vertically aligned TiO<sub>2</sub> nanowire arrays with high surface area on transparent conductive glass for highly efficient dye-sensitized solar cells†**

**Xiaoyue Wang,<sup>a</sup> Yong Liu,<sup>\*a</sup> Xiang Zhou,<sup>a</sup> Baojun Li,<sup>a</sup> Hai Wang,<sup>b</sup> Wenxia Zhao,<sup>c</sup> Hong Huang,<sup>c</sup> Chaolun Liang,<sup>c</sup> Xiao Yu,<sup>a</sup> Zhong Liu<sup>a</sup> and Hui Shen<sup>a</sup>**

<sup>a</sup> School of Physics and Engineering, State Key Laboratory of Optoelectronic Materials and Technologies, Sun Yat-sen University, Guangzhou 510275, China. Fax: +86-20-3933-2863; Tel: +86-20-3933-2866, E-mail: [liuyong7@mail.sysu.edu.cn](mailto:liuyong7@mail.sysu.edu.cn)

<sup>b</sup> Key Laboratory of New Processing Technology for Nonferrous Metal and Materials, Ministry of Education, Guilin University of Technology, Guilin 541004, China.

<sup>c</sup> Instrumental Analysis & Research center, Sun Yat-Sen University, Guangzhou 510275, China.

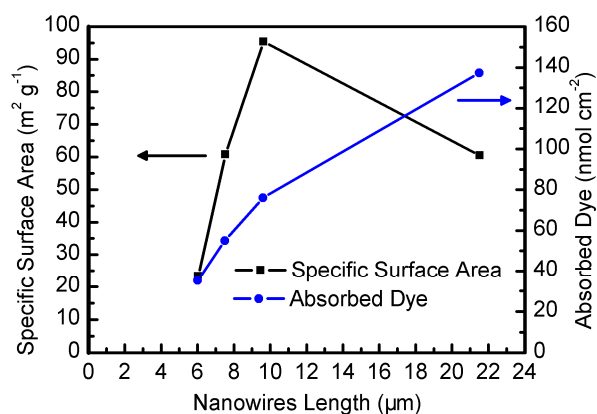

**Fig. S1** (a) Specific surface area and dye loading of nanowire films with different thickness. (b) Dye loading of different TiO<sub>2</sub> nanowire films.

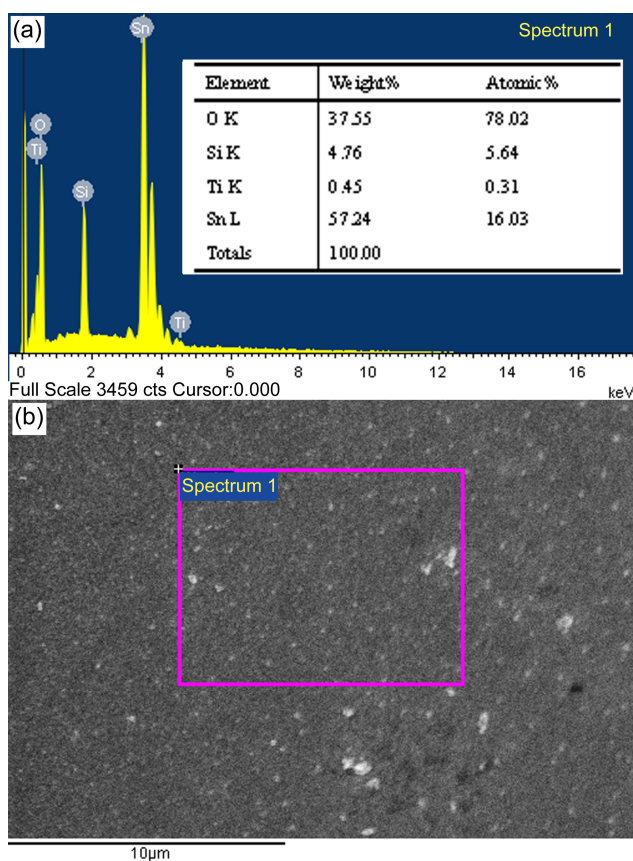

**Fig. S2** SEM image and the corresponding energy dispersive X-ray spectrometer spectra of seeded FTO glass. A very thin film of TiO<sub>2</sub> nanoparticles was deposited onto FTO substrates as crystal seeds. The detected Ti and O elements confirm that the TiO<sub>2</sub> nuclei have grown on FTO glass. And other elements such as Si, Sn and O are inferred from FTO glass.
